# Supplementary material for: Integrated CO2capture and electrochemical upgradation: the underpinning mechanism and techno-chemical analysis
Source: Royal Society of Chemistry journal article supplement (doi:10.1039/d2cs00512c), 2023-01-01
Supplement: d2cs00512c1.pdf [file d2cs00512c1.pdf]

**Table. S1** Summary of CO<sub>2</sub> reduction reaction using amines-based absorbent

| Co-catalyst | Additive    | Feed gas                           | Solvent + electrolyte | Electrode                                                                  | Applied potential | FE of H <sub>2</sub> (%) | FE of CO (%) | FE of formate/formic acid (%) | Ref. |
|-------------|-------------|------------------------------------|-----------------------|----------------------------------------------------------------------------|-------------------|--------------------------|--------------|-------------------------------|------|
| -           | 30 wt % MEA | Saturated CO <sub>2</sub> (2.46 M) | H <sub>2</sub> O      | WE : Smooth In metal electrode<br>CE : Pt plate<br>RE : Ag/AgCl (3 M NaCl) | -0.8 V vs. RHE    | 85.2                     | 4.8          | 2.4                           | 1    |
| -           | 30 wt % MEA | Saturated CO <sub>2</sub> (2.46 M) | H <sub>2</sub> O      | WE : Smooth In metal electrode<br>CE : Pt plate<br>RE : Ag/AgCl (3 M NaCl) | -1.1 V vs. RHE    | 95.7                     | 1.5          | 0.1                           | 1    |
| -           | 30 wt % MEA | Saturated CO <sub>2</sub> (2.46 M) | H <sub>2</sub> O      | WE : Smooth In metal electrode<br>CE : Pt plate<br>RE : Ag/AgCl (3 M NaCl) | -1.3 V vs. RHE    | 98.9                     | 0.7          | 0.1                           | 1    |
| -           | 30 wt % MEA | Saturated CO <sub>2</sub> (2.46 M) | H <sub>2</sub> O      | WE : Smooth Sn metal electrode<br>CE : Pt plate<br>RE : Ag/AgCl (3 M NaCl) | -0.8 V vs. RHE    | 84.9                     | 5.7          | 5.2                           | 1    |
| -           | 30 wt % MEA | Saturated CO <sub>2</sub> (2.46 M) | H <sub>2</sub> O      | WE : Smooth Sn metal electrode<br>CE : Pt plate<br>RE : Ag/AgCl (3 M NaCl) | -1.1 V vs. RHE    | 95.7                     | 1.3          | 1.0                           | 1    |
| -           | 30 wt % MEA | Saturated CO <sub>2</sub> (2.46 M) | H <sub>2</sub> O      | WE : Smooth Sn metal electrode<br>CE : Pt plate<br>RE : Ag/AgCl (3 M NaCl) | -1.3 V vs. RHE    | 97.4                     | 0.7          | 1.0                           | 1    |
| -           | 30 wt % MEA | Saturated CO <sub>2</sub> (2.46 M) | H <sub>2</sub> O      | WE : Smooth Bi metal electrode<br>CE : Pt plate<br>RE : Ag/AgCl (3 M NaCl) | -0.8 V vs. RHE    | 60.8                     | 4.1          | 35.7                          | 1    |
| -           | 30 wt % MEA | Saturated CO <sub>2</sub> (2.46 M) | H <sub>2</sub> O      | WE : Smooth Bi metal electrode<br>CE : Pt plate<br>RE : Ag/AgCl (3 M NaCl) | -1.1 V vs. RHE    | 82.9                     | 2.1          | 10.1                          | 1    |
| -           | 30 wt % MEA | Saturated CO <sub>2</sub> (2.46 M) | H <sub>2</sub> O      | WE : Smooth Bi metal electrode<br>CE : Pt plate<br>RE : Ag/AgCl (3 M NaCl) | -1.3 V vs. RHE    | 88.8                     | 1.1          | 5.3                           | 1    |
| -           | 30 wt % MEA | Saturated CO <sub>2</sub> (2.46 M) | H <sub>2</sub> O      | WE : Smooth Pb metal electrode<br>CE : Pt plate<br>RE : Ag/AgCl (3 M NaCl) | -0.8 V vs. RHE    | 97.0                     | 0.1          | 3.7                           | 1    |
| -           | 30 wt % MEA | Saturated CO <sub>2</sub> (2.46 M) | H <sub>2</sub> O      | WE : Smooth Pb metal electrode<br>CE : Pt plate<br>RE : Ag/AgCl (3 M NaCl) | -1.1 V vs. RHE    | 97.8                     | 0.1          | 0.3                           | 1    |
| -           | 30 wt % MEA | Saturated CO <sub>2</sub> (2.46 M) | H <sub>2</sub> O      | WE : Smooth Pb metal electrode<br>CE : Pt plate<br>RE : Ag/AgCl (3 M NaCl) | -1.3 V vs. RHE    | 101.7                    | 0.1          | 1.6                           | 1    |
| -           | 30 wt % MEA | Saturated CO <sub>2</sub> (2.46 M) | H <sub>2</sub> O      | WE : Smooth Pd metal electrode<br>CE : Pt plate<br>RE : Ag/AgCl (3 M NaCl) | -0.1 V vs. RHE    | 87.8                     | -            | 1.0                           | 1    |
| -           | 30 wt % MEA | Saturated CO <sub>2</sub> (2.46 M) | H <sub>2</sub> O      | WE : Smooth Pd metal electrode<br>CE : Pt plate<br>RE : Ag/AgCl (3 M NaCl) | -0.4 V vs. RHE    | 81.6                     | -            | 1.0                           | 1    |
| -           | 30 wt % MEA | Saturated CO <sub>2</sub> (2.46 M) | H <sub>2</sub> O      | WE : Smooth Pd metal electrode<br>CE : Pt plate<br>RE : Ag/AgCl (3 M NaCl) | -0.8 V vs. RHE    | 80.0                     | -            | 0.7                           | 1    |
| -           | 30 wt % MEA | Saturated CO <sub>2</sub> (2.46 M) | H <sub>2</sub> O      | WE : Smooth Ag metal electrode<br>CE : Pt plate<br>RE : Ag/AgCl (3 M NaCl) | -0.8 V vs. RHE    | 85.8                     | 12.4         | 1.3                           | 1    |
| -           | 30 wt % MEA | Saturated CO <sub>2</sub> (2.46 M) | H <sub>2</sub> O      | WE : Smooth Ag metal electrode<br>CE : Pt plate<br>RE : Ag/AgCl (3 M NaCl) | -1.1 V vs. RHE    | 93.0                     | 6.1          | 1.0                           | 1    |
| -           | 30 wt % MEA | Saturated CO <sub>2</sub> (2.46 M) | H <sub>2</sub> O      | WE : Smooth Ag metal electrode<br>CE : Pt plate<br>RE : Ag/AgCl (3 M NaCl) | -1.3 V vs. RHE    | 94.2                     | 2.3          | 1.2                           | 1    |
| -           | 30 wt % MEA | Saturated CO <sub>2</sub> (2.46 M) | H <sub>2</sub> O      | WE : Smooth Cu metal electrode<br>CE : Pt plate<br>RE : Ag/AgCl (3 M NaCl) | -0.8 V vs. RHE    | 90.2                     | 0.5          | 0.8                           | 1    |
| -           | 30 wt % MEA | Saturated CO <sub>2</sub> (2.46 M) | H <sub>2</sub> O      | WE : Smooth Cu metal electrode<br>CE : Pt plate<br>RE : Ag/AgCl (3 M NaCl) | -1.1 V vs. RHE    | 93.4                     | -            | 0.6                           | 1    |
| -           | 30 wt % MEA | Saturated CO <sub>2</sub> (2.46 M) | H <sub>2</sub> O      | WE : Smooth Cu metal electrode<br>CE : Pt plate<br>RE : Ag/AgCl (3 M NaCl) | -1.3 V vs. RHE    | 94.2                     | -            | 0.7                           | 1    |

|   |             |                                       |                                |                                                                               |                   |       |      |      |   |
|---|-------------|---------------------------------------|--------------------------------|-------------------------------------------------------------------------------|-------------------|-------|------|------|---|
| - | 30 wt % MEA | Saturated CO <sub>2</sub><br>(2.46 M) | H <sub>2</sub> O               | WE : Smooth Zn metal<br>electrode<br>CE : Pt plate<br>RE : Ag/AgCl (3 M NaCl) | -0.8 V vs.<br>RHE | 97.3  | 0.8  | 2.1  | 1 |
| - | 30 wt % MEA | Saturated CO <sub>2</sub><br>(2.46 M) | H <sub>2</sub> O               | WE : Smooth Zn metal<br>electrode<br>CE : Pt plate<br>RE : Ag/AgCl (3 M NaCl) | -1.1 V vs.<br>RHE | 104.7 | 0.5  | 0.8  | 1 |
| - | 30 wt % MEA | Saturated CO <sub>2</sub><br>(2.46 M) | H <sub>2</sub> O               | WE : Smooth Zn metal<br>electrode<br>CE : Pt plate<br>RE : Ag/AgCl (3 M NaCl) | -1.3 V vs.<br>RHE | 95.7  | 0.3  | 0.2  | 1 |
| - | 30 wt % MEA | Saturated CO <sub>2</sub><br>(2.46 M) | 0.1 wt % CTAB/H <sub>2</sub> O | WE : Smooth In metal<br>electrode<br>CE : Pt plate<br>RE : Ag/AgCl (3 M NaCl) | -0.8 V vs.<br>RHE | 41.9  | 17.0 | 45.4 | 1 |
| - | 30 wt % MEA | Saturated CO <sub>2</sub><br>(2.46 M) | 0.1 wt % CTAB/H <sub>2</sub> O | WE : Smooth In metal<br>electrode<br>CE : Pt plate<br>RE : Ag/AgCl (3 M NaCl) | -1.1 V vs.<br>RHE | 42.0  | 10.7 | 39.4 | 1 |
| - | 30 wt % MEA | Saturated CO <sub>2</sub><br>(2.46 M) | 0.1 wt % CTAB/H <sub>2</sub> O | WE : Smooth In metal<br>electrode<br>CE : Pt plate<br>RE : Ag/AgCl (3 M NaCl) | -1.3 V vs.<br>RHE | 44.3  | 11.2 | 36.5 | 1 |
| - | 30 wt % MEA | Saturated CO <sub>2</sub><br>(2.46 M) | 0.1 wt % CTAB/H <sub>2</sub> O | WE : Smooth Sn metal<br>electrode<br>CE : Pt plate<br>RE : Ag/AgCl (3 M NaCl) | -0.8 V vs.<br>RHE | 68.6  | 9.0  | 19.0 | 1 |
| - | 30 wt % MEA | Saturated CO <sub>2</sub><br>(2.46 M) | 0.1 wt % CTAB/H <sub>2</sub> O | WE : Smooth Sn metal<br>electrode<br>CE : Pt plate<br>RE : Ag/AgCl (3 M NaCl) | -1.1 V vs.<br>RHE | 78.5  | 3.6  | 16.4 | 1 |
| - | 30 wt % MEA | Saturated CO <sub>2</sub><br>(2.46 M) | 0.1 wt % CTAB/H <sub>2</sub> O | WE : Smooth Sn metal<br>electrode<br>CE : Pt plate<br>RE : Ag/AgCl (3 M NaCl) | -1.3 V vs.<br>RHE | 93.4  | 2.6  | 2.0  | 1 |
| - | 30 wt % MEA | Saturated CO <sub>2</sub><br>(2.46 M) | 0.1 wt % CTAB/H <sub>2</sub> O | WE : Smooth Bi metal<br>electrode<br>CE : Pt plate<br>RE : Ag/AgCl (3 M NaCl) | -0.8 V vs.<br>RHE | 69.5  | 7.0  | 24.3 | 1 |
| - | 30 wt % MEA | Saturated CO <sub>2</sub><br>(2.46 M) | 0.1 wt % CTAB/H <sub>2</sub> O | WE : Smooth Bi metal<br>electrode<br>CE : Pt plate<br>RE : Ag/AgCl (3 M NaCl) | -1.1 V vs.<br>RHE | 87.1  | 4.9  | 7.1  | 1 |
| - | 30 wt % MEA | Saturated CO <sub>2</sub><br>(2.46 M) | 0.1 wt % CTAB/H <sub>2</sub> O | WE : Smooth Bi metal<br>electrode<br>CE : Pt plate<br>RE : Ag/AgCl (3 M NaCl) | -1.3 V vs.<br>RHE | 93.4  | 2.6  | 3.9  | 1 |
| - | 30 wt % MEA | Saturated CO <sub>2</sub><br>(2.46 M) | 0.1 wt % CTAB/H <sub>2</sub> O | WE : Smooth Pb metal<br>electrode<br>CE : Pt plate<br>RE : Ag/AgCl (3 M NaCl) | -0.8 V vs.<br>RHE | 79.6  | 1.9  | 8.5  | 1 |
| - | 30 wt % MEA | Saturated CO <sub>2</sub><br>(2.46 M) | 0.1 wt % CTAB/H <sub>2</sub> O | WE : Smooth Pb metal<br>electrode<br>CE : Pt plate<br>RE : Ag/AgCl (3 M NaCl) | -1.1 V vs.<br>RHE | 79.2  | 3.0  | 8.7  | 1 |
| - | 30 wt % MEA | Saturated CO <sub>2</sub><br>(2.46 M) | 0.1 wt % CTAB/H <sub>2</sub> O | WE : Smooth Pb metal<br>electrode<br>CE : Pt plate<br>RE : Ag/AgCl (3 M NaCl) | -1.3 V vs.<br>RHE | 85.1  | 3.5  | 6.1  | 1 |
| - | 30 wt % MEA | Saturated CO <sub>2</sub><br>(2.46 M) | 0.1 wt % CTAB/H <sub>2</sub> O | WE : Smooth Pd metal<br>electrode<br>CE : Pt plate<br>RE : Ag/AgCl (3 M NaCl) | -0.1 V vs.<br>RHE | 91.6  | -    | 4.0  | 1 |
| - | 30 wt % MEA | Saturated CO <sub>2</sub><br>(2.46 M) | 0.1 wt % CTAB/H <sub>2</sub> O | WE : Smooth Pd metal<br>electrode<br>CE : Pt plate<br>RE : Ag/AgCl (3 M NaCl) | -0.4 V vs.<br>RHE | 87.3  | -    | 4.1  | 1 |
| - | 30 wt % MEA | Saturated CO <sub>2</sub><br>(2.46 M) | 0.1 wt % CTAB/H <sub>2</sub> O | WE : Smooth Pd metal<br>electrode<br>CE : Pt plate<br>RE : Ag/AgCl (3 M NaCl) | -0.8 V vs.<br>RHE | 96.0  | -    | 0.1  | 1 |
| - | 30 wt % MEA | Saturated CO <sub>2</sub><br>(2.46 M) | 0.1 wt % CTAB/H <sub>2</sub> O | WE : Smooth Ag metal<br>electrode<br>CE : Pt plate<br>RE : Ag/AgCl (3 M NaCl) | -0.8 V vs.<br>RHE | 62.8  | 33.4 | 2.0  | 1 |
| - | 30 wt % MEA | Saturated CO <sub>2</sub><br>(2.46 M) | 0.1 wt % CTAB/H <sub>2</sub> O | WE : Smooth Ag metal<br>electrode<br>CE : Pt plate<br>RE : Ag/AgCl (3 M NaCl) | -1.1 V vs.<br>RHE | 84.7  | 15.9 | 2.8  | 1 |
| - | 30 wt % MEA | Saturated CO <sub>2</sub><br>(2.46 M) | 0.1 wt % CTAB/H <sub>2</sub> O | WE : Smooth Ag metal<br>electrode<br>CE : Pt plate<br>RE : Ag/AgCl (3 M NaCl) | -1.3 V vs.<br>RHE | 89.5  | 9.2  | 1.7  | 1 |
| - | 30 wt % MEA | Saturated CO <sub>2</sub><br>(2.46 M) | 0.1 wt % CTAB/H <sub>2</sub> O | WE : Smooth Cu metal<br>electrode<br>CE : Pt plate<br>RE : Ag/AgCl (3 M NaCl) | -0.8 V vs.<br>RHE | 79.7  | 1.7  | 19.1 | 1 |

|   |             |                                       |                                |                                                                               |                   |       |      |      |   |
|---|-------------|---------------------------------------|--------------------------------|-------------------------------------------------------------------------------|-------------------|-------|------|------|---|
| - | 30 wt % MEA | Saturated CO <sub>2</sub><br>(2.46 M) | 0.1 wt % CTAB/H <sub>2</sub> O | WE : Smooth Cu metal<br>electrode<br>CE : Pt plate<br>RE : Ag/AgCl (3 M NaCl) | -1.1 V vs.<br>RHE | 98.1  | -    | 0.5  | 1 |
| - | 30 wt % MEA | Saturated CO <sub>2</sub><br>(2.46 M) | 0.1 wt % CTAB/H <sub>2</sub> O | WE : Smooth Cu metal<br>electrode<br>CE : Pt plate<br>RE : Ag/AgCl (3 M NaCl) | -1.3 V vs.<br>RHE | 91.0  | -    | 0.1  | 1 |
| - | 30 wt % MEA | Saturated CO <sub>2</sub><br>(2.46 M) | 0.1 wt % CTAB/H <sub>2</sub> O | WE : Smooth Zn metal<br>electrode<br>CE : Pt plate<br>RE : Ag/AgCl (3 M NaCl) | -0.8 V vs.<br>RHE | 103.0 | 3.7  | 5.4  | 1 |
| - | 30 wt % MEA | Saturated CO <sub>2</sub><br>(2.46 M) | 0.1 wt % CTAB/H <sub>2</sub> O | WE : Smooth Zn metal<br>electrode<br>CE : Pt plate<br>RE : Ag/AgCl (3 M NaCl) | -1.1 V vs.<br>RHE | 91.4  | 2.9  | 2.0  | 1 |
| - | 30 wt % MEA | Saturated CO <sub>2</sub><br>(2.46 M) | 0.1 wt % CTAB/H <sub>2</sub> O | WE : Smooth Zn metal<br>electrode<br>CE : Pt plate<br>RE : Ag/AgCl (3 M NaCl) | -1.3 V vs.<br>RHE | 102.0 | 0.5  | 2.0  | 1 |
| - | 30 wt % MEA | Saturated CO <sub>2</sub><br>(2.46 M) | H <sub>2</sub> O               | WE : Porous In metal<br>electrode<br>CE : Pt plate<br>RE : Ag/AgCl (3 M NaCl) | -0.8 V vs.<br>RHE | 82.3  | 2.0  | 13.4 | 1 |
| - | 30 wt % MEA | Saturated CO <sub>2</sub><br>(2.46 M) | H <sub>2</sub> O               | WE : Porous In metal<br>electrode<br>CE : Pt plate<br>RE : Ag/AgCl (3 M NaCl) | -1.1 V vs.<br>RHE | 91.4  | 0.5  | 0.6  | 1 |
| - | 30 wt % MEA | Saturated CO <sub>2</sub><br>(2.46 M) | H <sub>2</sub> O               | WE : Porous In metal<br>electrode<br>CE : Pt plate<br>RE : Ag/AgCl (3 M NaCl) | -1.3 V vs.<br>RHE | 95.6  | 0.1  | 5.3  | 1 |
| - | 30 wt % MEA | Saturated CO <sub>2</sub><br>(2.46 M) | H <sub>2</sub> O               | WE : Porous Sn metal<br>electrode<br>CE : Pt plate<br>RE : Ag/AgCl (3 M NaCl) | -0.8 V vs.<br>RHE | 79.2  | 8.9  | 4.1  | 1 |
| - | 30 wt % MEA | Saturated CO <sub>2</sub><br>(2.46 M) | H <sub>2</sub> O               | WE : Porous Sn metal<br>electrode<br>CE : Pt plate<br>RE : Ag/AgCl (3 M NaCl) | -1.1 V vs.<br>RHE | 86.7  | 6.3  | 2.4  | 1 |
| - | 30 wt % MEA | Saturated CO <sub>2</sub><br>(2.46 M) | H <sub>2</sub> O               | WE : Porous Sn metal<br>electrode<br>CE : Pt plate<br>RE : Ag/AgCl (3 M NaCl) | -1.3 V vs.<br>RHE | 95.6  | 2.0  | 3.3  | 1 |
| - | 30 wt % MEA | Saturated CO <sub>2</sub><br>(2.46 M) | H <sub>2</sub> O               | WE : Porous Bi metal<br>electrode<br>CE : Pt plate<br>RE : Ag/AgCl (3 M NaCl) | -0.8 V vs.<br>RHE | 67.5  | 5.2  | 18.3 | 1 |
| - | 30 wt % MEA | Saturated CO <sub>2</sub><br>(2.46 M) | H <sub>2</sub> O               | WE : Porous Bi metal<br>electrode<br>CE : Pt plate<br>RE : Ag/AgCl (3 M NaCl) | -1.1 V vs.<br>RHE | 85.7  | 2.4  | 8.2  | 1 |
| - | 30 wt % MEA | Saturated CO <sub>2</sub><br>(2.46 M) | H <sub>2</sub> O               | WE : Porous Bi metal<br>electrode<br>CE : Pt plate<br>RE : Ag/AgCl (3 M NaCl) | -1.3 V vs.<br>RHE | 84.6  | 1.9  | 7.7  | 1 |
| - | 30 wt % MEA | Saturated CO <sub>2</sub><br>(2.46 M) | H <sub>2</sub> O               | WE : Porous Pb metal<br>electrode<br>CE : Pt plate<br>RE : Ag/AgCl (3 M NaCl) | -0.8 V vs.<br>RHE | 92.5  | 0.9  | 2.2  | 1 |
| - | 30 wt % MEA | Saturated CO <sub>2</sub><br>(2.46 M) | H <sub>2</sub> O               | WE : Porous Pb metal<br>electrode<br>CE : Pt plate<br>RE : Ag/AgCl (3 M NaCl) | -1.1 V vs.<br>RHE | 101.8 | 0.4  | 4.5  | 1 |
| - | 30 wt % MEA | Saturated CO <sub>2</sub><br>(2.46 M) | H <sub>2</sub> O               | WE : Porous Pb metal<br>electrode<br>CE : Pt plate<br>RE : Ag/AgCl (3 M NaCl) | -1.3 V vs.<br>RHE | 95.0  | 0.6  | 4.2  | 1 |
| - | 30 wt % MEA | Saturated CO <sub>2</sub><br>(2.46 M) | H <sub>2</sub> O               | WE : Porous Pd metal<br>electrode<br>CE : Pt plate<br>RE : Ag/AgCl (3 M NaCl) | -0.5 V vs.<br>RHE | 75.9  | 0.1  | 2.5  | 1 |
| - | 30 wt % MEA | Saturated CO <sub>2</sub><br>(2.46 M) | H <sub>2</sub> O               | WE : Porous Pd metal<br>electrode<br>CE : Pt plate<br>RE : Ag/AgCl (3 M NaCl) | -0.8 V vs.<br>RHE | 85.9  | 0.1  | 4.1  | 1 |
| - | 30 wt % MEA | Saturated CO <sub>2</sub><br>(2.46 M) | H <sub>2</sub> O               | WE : Porous Ag metal<br>electrode<br>CE : Pt plate<br>RE : Ag/AgCl (3 M NaCl) | -0.8 V vs.<br>RHE | 60.2  | 39.1 | 0.2  | 1 |
| - | 30 wt % MEA | Saturated CO <sub>2</sub><br>(2.46 M) | H <sub>2</sub> O               | WE : Porous Ag metal<br>electrode<br>CE : Pt plate<br>RE : Ag/AgCl (3 M NaCl) | -1.1 V vs.<br>RHE | 85.5  | 12.0 | 3.9  | 1 |
| - | 30 wt % MEA | Saturated CO <sub>2</sub><br>(2.46 M) | H <sub>2</sub> O               | WE : Porous Ag metal<br>electrode<br>CE : Pt plate<br>RE : Ag/AgCl (3 M NaCl) | -1.3 V vs.<br>RHE | 91.0  | 5.0  | 2.1  | 1 |

|   |             |                                       |                                |                                                                               |                   |       |      |      |   |
|---|-------------|---------------------------------------|--------------------------------|-------------------------------------------------------------------------------|-------------------|-------|------|------|---|
| - | 30 wt % MEA | Saturated CO <sub>2</sub><br>(2.46 M) | H <sub>2</sub> O               | WE : Porous Cu metal<br>electrode<br>CE : Pt plate<br>RE : Ag/AgCl (3 M NaCl) | -0.8 V vs.<br>RHE | 96.0  | 0.1  | 0.1  | 1 |
| - | 30 wt % MEA | Saturated CO <sub>2</sub><br>(2.46 M) | H <sub>2</sub> O               | WE : Porous Cu metal<br>electrode<br>CE : Pt plate<br>RE : Ag/AgCl (3 M NaCl) | -1.1 V vs.<br>RHE | 98.5  | 0.1  | 1.7  | 1 |
| - | 30 wt % MEA | Saturated CO <sub>2</sub><br>(2.46 M) | H <sub>2</sub> O               | WE : Porous Cu metal<br>electrode<br>CE : Pt plate<br>RE : Ag/AgCl (3 M NaCl) | -1.3 V vs.<br>RHE | 101.9 | -    | 0.7  | 1 |
| - | 30 wt % MEA | Saturated CO <sub>2</sub><br>(2.46 M) | H <sub>2</sub> O               | WE : Porous Zn metal<br>electrode<br>CE : Pt plate<br>RE : Ag/AgCl (3 M NaCl) | -0.8 V vs.<br>RHE | 113.8 | 0.6  | 9.0  | 1 |
| - | 30 wt % MEA | Saturated CO <sub>2</sub><br>(2.46 M) | H <sub>2</sub> O               | WE : Porous Zn metal<br>electrode<br>CE : Pt plate<br>RE : Ag/AgCl (3 M NaCl) | -1.1 V vs.<br>RHE | 120.0 | 0.2  | 2.4  | 1 |
| - | 30 wt % MEA | Saturated CO <sub>2</sub><br>(2.46 M) | H <sub>2</sub> O               | WE : Porous Zn metal<br>electrode<br>CE : Pt plate<br>RE : Ag/AgCl (3 M NaCl) | -1.3 V vs.<br>RHE | 118.5 | 0.4  | 2.2  | 1 |
| - | 30 wt % MEA | Saturated CO <sub>2</sub><br>(2.46 M) | 0.1 wt % CTAB/H <sub>2</sub> O | WE : Porous In metal<br>electrode<br>CE : Pt plate<br>RE : Ag/AgCl (3 M NaCl) | -0.8 V vs.<br>RHE | 14.3  | 22.8 | 54.5 | 1 |
| - | 30 wt % MEA | Saturated CO <sub>2</sub><br>(2.46 M) | 0.1 wt % CTAB/H <sub>2</sub> O | WE : Porous In metal<br>electrode<br>CE : Pt plate<br>RE : Ag/AgCl (3 M NaCl) | -1.1 V vs.<br>RHE | 53.3  | 7.6  | 30.0 | 1 |
| - | 30 wt % MEA | Saturated CO <sub>2</sub><br>(2.46 M) | 0.1 wt % CTAB/H <sub>2</sub> O | WE : Porous In metal<br>electrode<br>CE : Pt plate<br>RE : Ag/AgCl (3 M NaCl) | -1.3 V vs.<br>RHE | 74.2  | 3.9  | 19.6 | 1 |
| - | 30 wt % MEA | Saturated CO <sub>2</sub><br>(2.46 M) | 0.1 wt % CTAB/H <sub>2</sub> O | WE : Porous Sn metal<br>electrode<br>CE : Pt plate<br>RE : Ag/AgCl (3 M NaCl) | -0.8 V vs.<br>RHE | 66.1  | 16.6 | 11.6 | 1 |
| - | 30 wt % MEA | Saturated CO <sub>2</sub><br>(2.46 M) | 0.1 wt % CTAB/H <sub>2</sub> O | WE : Porous Sn metal<br>electrode<br>CE : Pt plate<br>RE : Ag/AgCl (3 M NaCl) | -1.1 V vs.<br>RHE | 81.7  | 9.0  | 4.8  | 1 |
| - | 30 wt % MEA | Saturated CO <sub>2</sub><br>(2.46 M) | 0.1 wt % CTAB/H <sub>2</sub> O | WE : Porous Sn metal<br>electrode<br>CE : Pt plate<br>RE : Ag/AgCl (3 M NaCl) | -1.3 V vs.<br>RHE | 90.2  | 5.0  | 4.4  | 1 |
| - | 30 wt % MEA | Saturated CO <sub>2</sub><br>(2.46 M) | 0.1 wt % CTAB/H <sub>2</sub> O | WE : Porous Bi metal<br>electrode<br>CE : Pt plate<br>RE : Ag/AgCl (3 M NaCl) | -0.8 V vs.<br>RHE | 58.5  | 4.9  | 36.0 | 1 |
| - | 30 wt % MEA | Saturated CO <sub>2</sub><br>(2.46 M) | 0.1 wt % CTAB/H <sub>2</sub> O | WE : Porous Bi metal<br>electrode<br>CE : Pt plate<br>RE : Ag/AgCl (3 M NaCl) | -1.1 V vs.<br>RHE | 79.5  | 3.4  | 13.0 | 1 |
| - | 30 wt % MEA | Saturated CO <sub>2</sub><br>(2.46 M) | 0.1 wt % CTAB/H <sub>2</sub> O | WE : Porous Bi metal<br>electrode<br>CE : Pt plate<br>RE : Ag/AgCl (3 M NaCl) | -1.3 V vs.<br>RHE | 86.3  | 0.5  | 5.3  | 1 |
| - | 30 wt % MEA | Saturated CO <sub>2</sub><br>(2.46 M) | 0.1 wt % CTAB/H <sub>2</sub> O | WE : Porous Pb metal<br>electrode<br>CE : Pt plate<br>RE : Ag/AgCl (3 M NaCl) | -0.8 V vs.<br>RHE | 36.7  | 2.9  | 60.8 | 1 |
| - | 30 wt % MEA | Saturated CO <sub>2</sub><br>(2.46 M) | 0.1 wt % CTAB/H <sub>2</sub> O | WE : Porous Pb metal<br>electrode<br>CE : Pt plate<br>RE : Ag/AgCl (3 M NaCl) | -1.1 V vs.<br>RHE | 66.4  | 3.1  | 21.5 | 1 |
| - | 30 wt % MEA | Saturated CO <sub>2</sub><br>(2.46 M) | 0.1 wt % CTAB/H <sub>2</sub> O | WE : Porous Pb metal<br>electrode<br>CE : Pt plate<br>RE : Ag/AgCl (3 M NaCl) | -1.3 V vs.<br>RHE | 79.7  | 2.8  | 14.7 | 1 |
| - | 30 wt % MEA | Saturated CO <sub>2</sub><br>(2.46 M) | 0.1 wt % CTAB/H <sub>2</sub> O | WE : Porous Pd metal<br>electrode<br>CE : Pt plate<br>RE : Ag/AgCl (3 M NaCl) | -0.5 V vs.<br>RHE | 69.4  | 0.2  | 1.0  | 1 |
| - | 30 wt % MEA | Saturated CO <sub>2</sub><br>(2.46 M) | 0.1 wt % CTAB/H <sub>2</sub> O | WE : Porous Pd metal<br>electrode<br>CE : Pt plate<br>RE : Ag/AgCl (3 M NaCl) | -0.8 V vs.<br>RHE | 75.3  | -    | 1.1  | 1 |
| - | 30 wt % MEA | Saturated CO <sub>2</sub><br>(2.46 M) | 0.1 wt % CTAB/H <sub>2</sub> O | WE : Porous Ag metal<br>electrode<br>CE : Pt plate<br>RE : Ag/AgCl (3 M NaCl) | -0.8 V vs.<br>RHE | 56.0  | 38.2 | 2.4  | 1 |
| - | 30 wt % MEA | Saturated CO <sub>2</sub><br>(2.46 M) | 0.1 wt % CTAB/H <sub>2</sub> O | WE : Porous Ag metal<br>electrode<br>CE : Pt plate<br>RE : Ag/AgCl (3 M NaCl) | -1.1 V vs.<br>RHE | 62.8  | 34.3 | 1.6  | 1 |

|                                        |                                   |                                       |                                              |                                                                                              |                                   |                 |                |             |   |
|----------------------------------------|-----------------------------------|---------------------------------------|----------------------------------------------|----------------------------------------------------------------------------------------------|-----------------------------------|-----------------|----------------|-------------|---|
| -                                      | 30 wt % MEA                       | Saturated CO <sub>2</sub><br>(2.46 M) | 0.1 wt % CTAB/H <sub>2</sub> O               | WE : Porous Ag metal<br>electrode<br>CE : Pt plate<br>RE : Ag/AgCl (3 M NaCl)                | -1.3 V vs.<br>RHE                 | 79.7            | 20.0           | 1.3         | 1 |
| -                                      | 30 wt % MEA                       | Saturated CO <sub>2</sub><br>(2.46 M) | 0.1 wt % CTAB/H <sub>2</sub> O               | WE : Porous Cu metal<br>electrode<br>CE : Pt plate<br>RE : Ag/AgCl (3 M NaCl)                | -0.8 V vs.<br>RHE                 | 98.6            | 0.1            | 1.1         | 1 |
| -                                      | 30 wt % MEA                       | Saturated CO <sub>2</sub><br>(2.46 M) | 0.1 wt % CTAB/H <sub>2</sub> O               | WE : Porous Cu metal<br>electrode<br>CE : Pt plate<br>RE : Ag/AgCl (3 M NaCl)                | -1.1 V vs.<br>RHE                 | 103.0           | 0.1            | 0.8         | 1 |
| -                                      | 30 wt % MEA                       | Saturated CO <sub>2</sub><br>(2.46 M) | 0.1 wt % CTAB/H <sub>2</sub> O               | WE : Porous Cu metal<br>electrode<br>CE : Pt plate<br>RE : Ag/AgCl (3 M NaCl)                | -1.3 V vs.<br>RHE                 | 98.0            | -              | 0.8         | 1 |
| -                                      | 30 wt % MEA                       | Saturated CO <sub>2</sub><br>(2.46 M) | 0.1 wt % CTAB/H <sub>2</sub> O               | WE : Porous Zn metal<br>electrode<br>CE : Pt plate<br>RE : Ag/AgCl (3 M NaCl)                | -0.8 V vs.<br>RHE                 | 99.2            | 1.4            | 7.3         | 1 |
| -                                      | 30 wt % MEA                       | Saturated CO <sub>2</sub><br>(2.46 M) | 0.1 wt % CTAB/H <sub>2</sub> O               | WE : Porous Zn metal<br>electrode<br>CE : Pt plate<br>RE : Ag/AgCl (3 M NaCl)                | -1.1 V vs.<br>RHE                 | 115.3           | 2.4            | 3.3         | 1 |
| -                                      | 30 wt % MEA                       | Saturated CO <sub>2</sub><br>(2.46 M) | 0.1 wt % CTAB/H <sub>2</sub> O               | WE : Porous Zn metal<br>electrode<br>CE : Pt plate<br>RE : Ag/AgCl (3 M NaCl)                | -1.3 V vs.<br>RHE                 | 110.8           | 1.9            | 3.1         | 1 |
| -                                      | 0.1 M TMG                         | 0.85 atm CO <sub>2</sub>              | 0.1 M TBAPF <sub>6</sub> /CH <sub>3</sub> CN | WE : Graphite rod (type 1)<br>CE : Pt coil<br>RE : Fe/Fe <sup>+</sup> (internal<br>standard) | -2.40 V vs.<br>Fe/Fe <sup>+</sup> | -               | -              | 10.69       | 2 |
| -                                      | 0.1 M Aniline                     | 0.85 atm CO <sub>2</sub>              | 0.1 M TBAPF <sub>6</sub> /CH <sub>3</sub> CN | WE : Graphite rod (type 1)<br>CE : Pt coil<br>RE : Fe/Fe <sup>+</sup> (internal<br>standard) | -2.45 V vs.<br>Fe/Fe <sup>+</sup> | -               | -              | 6.56        | 2 |
| -                                      | 0.1 M Aniline + TMG               | 0.85 atm CO <sub>2</sub>              | 0.1 M TBAPF <sub>6</sub> /CH <sub>3</sub> CN | WE : Graphite rod (type 1)<br>CE : Pt coil<br>RE : Fe/Fe <sup>+</sup> (internal<br>standard) | -2.40 V vs.<br>Fe/Fe <sup>+</sup> | -               | -              | 15.76       | 2 |
| -                                      | 0.1 M TEOA                        | 0.85 atm CO <sub>2</sub>              | 0.1 M TBAPF <sub>6</sub> /CH <sub>3</sub> CN | WE : Graphite rod (type 1)<br>CE : Pt coil<br>RE : Fe/Fe <sup>+</sup> (internal<br>standard) | -2.45 V vs.<br>Fe/Fe <sup>+</sup> | -               | -              | 7.09        | 2 |
| -                                      | 0.1 M TEOA + TMG                  | 0.85 atm CO <sub>2</sub>              | 0.1 M TBAPF <sub>6</sub> /CH <sub>3</sub> CN | WE : Graphite rod (type 1)<br>CE : Pt coil<br>RE : Fe/Fe <sup>+</sup> (internal<br>standard) | -2.40 V vs.<br>Fe/Fe <sup>+</sup> | -               | -              | 7.52        | 2 |
| -                                      | 0.1 M Morpholine                  | 0.85 atm CO <sub>2</sub>              | 0.1 M TBAPF <sub>6</sub> /CH <sub>3</sub> CN | WE : Graphite rod (type 1)<br>CE : Pt coil<br>RE : Fe/Fe <sup>+</sup> (internal<br>standard) | -2.45 V vs.<br>Fe/Fe <sup>+</sup> | -               | -              | 5.86        | 2 |
| -                                      | 0.1 M Morpholine + TMG            | 0.85 atm CO <sub>2</sub>              | 0.1 M TBAPF <sub>6</sub> /CH <sub>3</sub> CN | WE : Graphite rod (type 1)<br>CE : Pt coil<br>RE : Fe/Fe <sup>+</sup> (internal<br>standard) | -2.40 V vs.<br>Fe/Fe <sup>+</sup> | -               | -              | 50.94       | 2 |
| -                                      | 0.1 M TEA                         | 0.85 atm CO <sub>2</sub>              | 0.1 M TBAPF <sub>6</sub> /CH <sub>3</sub> CN | WE : Graphite rod (type 1)<br>CE : Pt coil<br>RE : Fe/Fe <sup>+</sup> (internal<br>standard) | -2.50 V vs.<br>Fe/Fe <sup>+</sup> | -               | -              | 3.51        | 2 |
| -                                      | 0.1 M DEA                         | 0.85 atm CO <sub>2</sub>              | 0.1 M TBAPF <sub>6</sub> /CH <sub>3</sub> CN | WE : Graphite rod (type 1)<br>CE : Pt coil<br>RE : Fe/Fe <sup>+</sup> (internal<br>standard) | -2.40 V vs.<br>Fe/Fe <sup>+</sup> | -               | -              | 2.38        | 2 |
| -                                      | 0.1 M [DMAH][DMC]                 | 0.85 atm CO <sub>2</sub>              | 0.1 M TBAPF <sub>6</sub> /CH <sub>3</sub> CN | WE : Graphite rod (type 1)<br>CE : Pt coil<br>RE : Fe/Fe <sup>+</sup> (internal<br>standard) | -2.20 V vs.<br>Fe/Fe <sup>+</sup> | -               | -              | 3.80        | 2 |
| 1 mM (bpy)Mn(CO) <sub>3</sub> CN       | 0.1 M Morpholine                  | 0.85 atm CO <sub>2</sub>              | 0.1 M TBAPF <sub>6</sub> /CH <sub>3</sub> CN | WE : Graphite rod (type 1)<br>CE : Pt coil<br>RE : Fe/Fe <sup>+</sup> (internal<br>standard) | -2.20 V vs.<br>Fe/Fe <sup>+</sup> | 57.0<br>(±2.0)  | 9.0 (±1)       | 29.0 (±1.0) | 3 |
| 1 mM (bpy)Mn(CO) <sub>3</sub> CN       | 0.5 M PhOH                        | 0.85 atm CO <sub>2</sub>              | 0.1 M TBAPF <sub>6</sub> /CH <sub>3</sub> CN | WE : Graphite rod (type 1)<br>CE : Pt coil<br>RE : Fe/Fe <sup>+</sup> (internal<br>standard) | -2.20 V vs.<br>Fe/Fe <sup>+</sup> | 4.0             | 100.0          | -           | 3 |
| 1 mM (bpy)Mn(CO) <sub>3</sub> CN       | 0.1 M Morpholine + 0.5 M<br>PhOH  | 0.85 atm CO <sub>2</sub>              | 0.1 M TBAPF <sub>6</sub> /CH <sub>3</sub> CN | WE : Graphite rod (type 1)<br>CE : Pt coil<br>RE : Fe/Fe <sup>+</sup> (internal<br>standard) | -2.20 V vs.<br>Fe/Fe <sup>+</sup> | 124.0<br>(±1.0) | 4.0<br>(±1.0)  | -           | 3 |
| 1 mM (bpy)Mn(CO) <sub>3</sub> CN       | 0.1 M [morph-H][BF <sub>4</sub> ] | 0.85 atm N <sub>2</sub>               | 0.1 M TBAPF <sub>6</sub> /CH <sub>3</sub> CN | WE : Graphite rod (type 1)<br>CE : Pt coil<br>RE : Fe/Fe <sup>+</sup> (internal<br>standard) | -2.20 V vs.<br>Fe/Fe <sup>+</sup> | 111.0           | -              | -           | 3 |
| 1 mM<br>(mesbpy)Mn(CO) <sub>3</sub> Br | 0.1 M Morpholine                  | 0.85 atm CO <sub>2</sub>              | 0.1 M TBAPF <sub>6</sub> /CH <sub>3</sub> CN | WE : Graphite rod (type 1)<br>CE : Pt coil<br>RE : Fe/Fe <sup>+</sup> (internal<br>standard) | -2.20 V vs.<br>Fe/Fe <sup>+</sup> | 16.0<br>(±1.0)  | 65.0<br>(±1.0) | 35.0 (±1.0) | 3 |

|                                        |                                   |                           |                                                      |                                                                                                  |                                   |                |               |             |   |
|----------------------------------------|-----------------------------------|---------------------------|------------------------------------------------------|--------------------------------------------------------------------------------------------------|-----------------------------------|----------------|---------------|-------------|---|
| 1 mM<br>(mesbpy)Mn(CO) <sub>2</sub> Br | 0.5 M PhOH                        | 0.85 atm CO <sub>2</sub>  | 0.1 M TBAPF <sub>6</sub> /CH <sub>3</sub> CN         | WE : Graphite rod (type 1)<br>CE : Pt coil<br>RE : Fe/Fc <sup>+</sup> (internal standard)        | -2.20 V vs.<br>Fe/Fc <sup>+</sup> | -              | 120.0         | -           | 3 |
| 1 mM<br>(mesbpy)Mn(CO) <sub>2</sub> Br | 0.1 M Morpholine + 0.5 M PhOH     | 0.85 atm CO <sub>2</sub>  | 0.1 M TBAPF <sub>6</sub> /CH <sub>3</sub> CN         | WE : Graphite rod (type 1)<br>CE : Pt coil<br>RE : Fe/Fc <sup>+</sup> (internal standard)        | -2.20 V vs.<br>Fe/Fc <sup>+</sup> | 29.0<br>(±2.0) | 4.0<br>(±1.0) | 57.0 (±3.0) | 3 |
| 1 mM<br>(mesbpy)Mn(CO) <sub>2</sub> Br | 0.1 M [morph-H][BF <sub>4</sub> ] | 0.85 atm N <sub>2</sub>   | 0.1 M TBAPF <sub>6</sub> /CH <sub>3</sub> CN         | WE : Graphite rod (type 1)<br>CE : Pt coil<br>RE : Fe/Fc <sup>+</sup> (internal standard)        | -2.20 V vs.<br>Fe/Fc <sup>+</sup> | 81.0           | -             | -           | 3 |
| 1 mM<br>(mesbpy)Mn(CO) <sub>2</sub> Br | 0.1 M TEOA                        | 0.85 atm CO <sub>2</sub>  | 0.1 M TBAPF <sub>6</sub> /CH <sub>3</sub> CN         | WE : Graphite rod (type 1)<br>CE : Pt coil<br>RE : Fe/Fc <sup>+</sup> (internal standard)        | -2.20 V vs.<br>Fe/Fc <sup>+</sup> | -              | 112.0         | -           | 3 |
| 250 μM FeTPP                           | 40 mM PrOH                        | 15 mL/min CO <sub>2</sub> | 0.05 M TMABF <sub>4</sub> or TBAPF <sub>6</sub> /DMF | WE : Glassy carbon<br>CE : Pt mesh<br>RE : SCE electrode, Fe/Fc <sup>+</sup> (internal standard) | -2.40 V vs.<br>Fe/Fc <sup>+</sup> | -              | 29.0          | -           | 4 |
| 250 μM FeTPP                           | 40 mM PrOH + 40 mM Quinuclidine   | 15 mL/min CO <sub>2</sub> | 0.05 M TMABF <sub>4</sub> or TBAPF <sub>6</sub> /DMF | WE : Glassy carbon<br>CE : Pt mesh<br>RE : SCE electrode, Fe/Fc <sup>+</sup> (internal standard) | -2.40 V vs.<br>Fe/Fc <sup>+</sup> | 15.0           | 1.9           | 68.0        | 4 |
| 250 μM FeTPP                           | 40 mM PrOH + 40 mM TEA            | 15 mL/min CO <sub>2</sub> | 0.05 M TMABF <sub>4</sub> or TBAPF <sub>6</sub> /DMF | WE : Glassy carbon<br>CE : Pt mesh<br>RE : SCE electrode, Fe/Fc <sup>+</sup> (internal standard) | -2.40 V vs.<br>Fe/Fc <sup>+</sup> | -              | 2.1           | 72.0        | 4 |
| 250 μM FeTPP                           | 40 mM PrOH + 40 mM Hünig's base   | 15 mL/min CO <sub>2</sub> | 0.05 M TMABF <sub>4</sub> or TBAPF <sub>6</sub> /DMF | WE : Glassy carbon<br>CE : Pt mesh<br>RE : SCE electrode, Fe/Fc <sup>+</sup> (internal standard) | -2.40 V vs.<br>Fe/Fc <sup>+</sup> | -              | 0.9           | 21.0        | 4 |

**Table. S2** Summary of CO<sub>2</sub> reduction reaction using bicarbonates-based absorbent

| Catalysts | Additive   | Feed gas        | Solvent + electrolyte                                                                                           | Electrode                                                              | Applied potential     | FE of H <sub>2</sub> (%) | FE of CO (%) | FE of formate/formic acid (%) | Ref. |
|-----------|------------|-----------------|-----------------------------------------------------------------------------------------------------------------|------------------------------------------------------------------------|-----------------------|--------------------------|--------------|-------------------------------|------|
| -         | -          | -               | 0.1 M KHCO <sub>3</sub> /H <sub>2</sub> O                                                                       | WE : Sn foil<br>CE : Pt foil<br>RE : Ag/AgCl (3M KCl)                  | -1.6 V vs. Ag/AgCl    | -                        | -            | -                             | 5    |
| -         | -          | -               | 0.5 M KHCO <sub>3</sub> /H <sub>2</sub> O                                                                       | WE : Sn foil<br>CE : Pt foil<br>RE : Ag/AgCl (3M KCl)                  | -1.6 V vs. Ag/AgCl    | -                        | -            | 8.0                           | 5    |
| -         | -          | -               | 1.5 M KHCO <sub>3</sub> /H <sub>2</sub> O                                                                       | WE : Sn foil<br>CE : Pt foil<br>RE : Ag/AgCl (3M KCl)                  | -1.6 V vs. Ag/AgCl    | -                        | -            | 18.0                          | 5    |
| -         | -          | CO <sub>2</sub> | 1.5 M KHCO <sub>3</sub> /H <sub>2</sub> O                                                                       | WE : Sn foil<br>CE : Pt foil<br>RE : Ag/AgCl (3M KCl)                  | -1.6 V vs. Ag/AgCl    | -                        | -            | 47.0                          | 5    |
| -         | -          | -               | 2.0 M KHCO <sub>3</sub> /H <sub>2</sub> O                                                                       | WE : Sn wire<br>CE : Pt mesh<br>RE : Ag/AgCl 3 M                       | -0.9 V vs. RHE        | 88.0                     | -            | 12.0                          | 6    |
| -         | 1 mM CKC   | -               | 2.0 M KHCO <sub>3</sub> /H <sub>2</sub> O                                                                       | WE : Sn wire<br>CE : Pt mesh<br>RE : Ag/AgCl 3 M                       | -0.9 V vs. RHE        | 34.0                     | -            | 66.0                          | 6    |
| -         | 5 mM CKC   | -               | 2.0 M KHCO <sub>3</sub> /H <sub>2</sub> O                                                                       | WE : Sn wire<br>CE : Pt mesh<br>RE : Ag/AgCl 3 M                       | -0.9 V vs. RHE        | 34.0                     | -            | 66.0                          | 6    |
| -         | 0.5 mM CKC | -               | 2.0 M KHCO <sub>3</sub> /H <sub>2</sub> O                                                                       | WE : Sn wire<br>CE : Pt mesh<br>RE : Ag/AgCl 3 M                       | -0.9 V vs. RHE        | 30.0                     | -            | 70.0                          | 6    |
| -         | -          | -               | 0.5 M KHCO <sub>3</sub> /H <sub>2</sub> O                                                                       | WE : Sn wire<br>CE : Pt mesh<br>RE : Ag/AgCl 3 M                       | -0.9 V vs. RHE        | 87.0                     | -            | 13.0                          | 6    |
| -         | 1 mM CKC   | -               | 0.5 M KHCO <sub>3</sub> /H <sub>2</sub> O                                                                       | WE : Sn wire<br>CE : Pt mesh<br>RE : Ag/AgCl 3 M                       | -0.9 V vs. RHE        | 81.0                     | -            | 19.0                          | 6    |
| -         | -          | -               | 1.0 M KHCO <sub>3</sub> /H <sub>2</sub> O                                                                       | WE : Sn wire<br>CE : Pt mesh<br>RE : Ag/AgCl 3 M                       | -0.9 V vs. RHE        | 92.0                     | -            | 8.0                           | 6    |
| -         | 1 mM CKC   | -               | 1.0 M KHCO <sub>3</sub> /H <sub>2</sub> O                                                                       | WE : Sn wire<br>CE : Pt mesh<br>RE : Ag/AgCl 3 M                       | -0.9 V vs. RHE        | 29.0                     | -            | 71.0                          | 6    |
| -         | 1 mM CTAB  | -               | 2.0 M KHCO <sub>3</sub> /H <sub>2</sub> O                                                                       | WE : Sn wire<br>CE : Pt mesh<br>RE : Ag/AgCl 3 M                       | -0.9 V vs. RHE        | 49.0                     | -            | 51.0                          | 6    |
| -         | 1 mM CTAB  | -               | 0.5 M KHCO <sub>3</sub> /H <sub>2</sub> O                                                                       | WE : Sn wire<br>CE : Pt mesh<br>RE : Ag/AgCl 3 M                       | -0.9 V vs. RHE        | 74.0                     | -            | 26.0                          | 6    |
| -         | 1 mM CTAB  | -               | 1.0 M KHCO <sub>3</sub> /H <sub>2</sub> O                                                                       | WE : Sn wire<br>CE : Pt mesh<br>RE : Ag/AgCl 3 M                       | -0.9 V vs. RHE        | 66.0                     | -            | 34.0                          | 6    |
| -         | -          | -               | 0.5 M NaHCO <sub>3</sub> /H <sub>2</sub> O                                                                      | WE : Sn/CNT (10/90)<br>CE : stainless steel                            | -0.4021 V vs. Ag/AgCl | -                        | -            | 58.0                          | 7    |
| -         | -          | -               | 0.5 M NaHCO <sub>3</sub> /H <sub>2</sub> O                                                                      | WE : Sn/CNT/ND (10/90/100)<br>CE : stainless steel                     | -0.3292 V vs. Ag/AgCl | -                        | -            | 67.0                          | 7    |
| -         | -          | -               | 0.5 M NaHCO <sub>3</sub> /H <sub>2</sub> O                                                                      | WE : Sn/ND (10/100)<br>CE : stainless steel                            | -0.4368 V vs. Ag/AgCl | -                        | -            | 43.0                          | 7    |
| -         | -          | CO <sub>2</sub> | 0.1858 M H <sub>3</sub> PO <sub>4</sub> + 0.01402 M KH <sub>2</sub> PO <sub>4</sub> /H <sub>2</sub> O (pH 1.46) | WE : Cu/GDL<br>CE : Au coil<br>RE : RHE                                | -0.65 V vs. RHE       | -                        | -            | 0.1 <sup>a</sup>              | 8    |
| -         | -          | CO <sub>2</sub> | 0.1858 M H <sub>3</sub> PO <sub>4</sub> + 0.01402 M KH <sub>2</sub> PO <sub>4</sub> /H <sub>2</sub> O (pH 1.46) | WE : Cu/GDL (0.82 mg/cm <sup>2</sup> P4VP)<br>CE : Au coil<br>RE : RHE | -0.65 V vs. RHE       | -                        | -            | 0.1 <sup>a</sup>              | 8    |
| -         | -          | CO <sub>2</sub> | 0.0026 M H <sub>3</sub> PO <sub>4</sub> + 0.1974 M KH <sub>2</sub> PO <sub>4</sub> /H <sub>2</sub> O (pH 3.87)  | WE : Cu/GDL<br>CE : Au coil<br>RE : RHE                                | -0.65 V vs. RHE       | -                        | -            | 0.8 <sup>a</sup>              | 8    |
| -         | -          | CO <sub>2</sub> | 0.0026 M H <sub>3</sub> PO <sub>4</sub> + 0.1974 M KH <sub>2</sub> PO <sub>4</sub> /H <sub>2</sub> O (pH 3.87)  | WE : Cu/GDL (0.82 mg/cm <sup>2</sup> P4VP)<br>CE : Au coil<br>RE : RHE | -0.65 V vs. RHE       | -                        | -            | 6.0 <sup>a</sup>              | 8    |
| -         | -          | CO <sub>2</sub> | 0.1 M KH <sub>2</sub> PO <sub>4</sub> + 0.1 M K <sub>2</sub> HPO <sub>4</sub> /H <sub>2</sub> O (pH 6.7)        | WE : Cu/GDL<br>CE : Au coil<br>RE : RHE                                | -0.65 V vs. RHE       | -                        | -            | 7.0 <sup>a</sup>              | 8    |
| -         | -          | CO <sub>2</sub> | 0.1 M KH <sub>2</sub> PO <sub>4</sub> + 0.1 M K <sub>2</sub> HPO <sub>4</sub> /H <sub>2</sub> O (pH 6.7)        | WE : Cu/GDL (0.82 mg/cm <sup>2</sup> P4VP)<br>CE : Au coil<br>RE : RHE | -0.65 V vs. RHE       | -                        | -            | 11.5 <sup>a</sup>             | 8    |
| -         | -          | CO <sub>2</sub> | 0.1858 M H <sub>3</sub> PO <sub>4</sub> + 0.01402 M KH <sub>2</sub> PO <sub>4</sub> /H <sub>2</sub> O (pH 1.46) | WE : Cu/GDL<br>CE : Au coil<br>RE : RHE                                | -1.1 V vs. RHE        | -                        | -            | - <sup>a</sup>                | 8    |
| -         | -          | CO <sub>2</sub> | 0.1858 M H <sub>3</sub> PO <sub>4</sub> + 0.01402 M KH <sub>2</sub> PO <sub>4</sub> /H <sub>2</sub> O (pH 1.46) | WE : Cu/GDL (0.82 mg/cm <sup>2</sup> P4VP)<br>CE : Au coil<br>RE : RHE | -1.1 V vs. RHE        | -                        | -            | - <sup>a</sup>                | 8    |
| -         | -          | CO <sub>2</sub> | 0.0026 M H <sub>3</sub> PO <sub>4</sub> + 0.1974 M KH <sub>2</sub> PO <sub>4</sub> /H <sub>2</sub> O (pH 3.87)  | WE : Cu/GDL<br>CE : Au coil<br>RE : RHE                                | -1.1 V vs. RHE        | -                        | -            | 3.0 <sup>a</sup>              | 8    |

|   |                                                                                           |                                |                                                                                                                      |                                                                                                  |                                             |   |      |                   |                 |
|---|-------------------------------------------------------------------------------------------|--------------------------------|----------------------------------------------------------------------------------------------------------------------|--------------------------------------------------------------------------------------------------|---------------------------------------------|---|------|-------------------|-----------------|
| - | -                                                                                         | CO <sub>2</sub>                | 0.0026 M H <sub>3</sub> PO <sub>4</sub> + 0.1974 M KH <sub>2</sub> PO <sub>4</sub> /H <sub>2</sub> O (pH 3.87)       | WE : Cu/GDL (0.82 mg/cm <sup>2</sup> P4VP)<br>CE : Au coil<br>RE : RHE                           | -1.1 V vs. RHE                              | - | -    | 15.0 <sup>a</sup> | 8               |
| - | -                                                                                         | CO <sub>2</sub>                | 0.1 M KH <sub>2</sub> PO <sub>4</sub> + 0.1 M K <sub>2</sub> HPO <sub>4</sub> /H <sub>2</sub> O (pH 6.7)             | WE : Cu/GDL<br>CE : Au coil<br>RE : RHE                                                          | -1.1 V vs. RHE                              | - | -    | 8.5 <sup>a</sup>  | 8               |
| - | -                                                                                         | CO <sub>2</sub>                | 0.1 M KH <sub>2</sub> PO <sub>4</sub> + 0.1 M K <sub>2</sub> HPO <sub>4</sub> /H <sub>2</sub> O (pH 6.7)             | WE : Cu/GDL (0.82 mg/cm <sup>2</sup> P4VP)<br>CE : Au coil<br>RE : RHE                           | -1.1 V vs. RHE                              | - | -    | 6.0 <sup>a</sup>  | 8               |
| - | -                                                                                         | CO <sub>2</sub>                | 0.5 M NaHCO <sub>3</sub> /H <sub>2</sub> O                                                                           | WE : Pd/C<br>CE : Pt foil or gauze<br>RE : Ag/AgCl (3 M NaCl)                                    | -0.05 V vs. RHE                             | - | -    | 89.0 <sup>a</sup> | 9               |
| - | -                                                                                         | CO <sub>2</sub>                | 0.5 M NaHCO <sub>3</sub> /H <sub>2</sub> O                                                                           | WE : Pd/C<br>CE : Pt foil or gauze<br>RE : Ag/AgCl (3 M NaCl)                                    | -0.15 V vs. RHE                             | - | -    | 96.0 <sup>a</sup> | 9               |
| - | -                                                                                         | CO <sub>2</sub>                | 0.5 M NaHCO <sub>3</sub> /H <sub>2</sub> O                                                                           | WE : Pd/C<br>CE : Pt foil or gauze<br>RE : Ag/AgCl (3 M NaCl)                                    | -0.25 V vs. RHE                             | - | -    | 94.0 <sup>a</sup> | 9               |
| - | -                                                                                         | CO <sub>2</sub>                | 0.5 M NaHCO <sub>3</sub> /H <sub>2</sub> O                                                                           | WE : Pd/C<br>CE : Pt foil or gauze<br>RE : Ag/AgCl (3 M NaCl)                                    | -0.35 V vs. RHE                             | - | -    | 85.0 <sup>a</sup> | 9               |
| - | -                                                                                         | CO <sub>2</sub>                | 2.8 M KHCO <sub>3</sub> /H <sub>2</sub> O                                                                            | WE : Pd/C<br>CE : Pt foil or gauze<br>RE : Ag/AgCl (3 M NaCl)                                    | -0.05 V vs. RHE                             | - | -    | 99.0 <sup>a</sup> | 9               |
| - | -                                                                                         | CO <sub>2</sub>                | 2.8 M KHCO <sub>3</sub> /H <sub>2</sub> O                                                                            | WE : Pd/C<br>CE : Pt foil or gauze<br>RE : Ag/AgCl (3 M NaCl)                                    | -0.15 V vs. RHE                             | - | -    | 99.0 <sup>a</sup> | 9               |
| - | -                                                                                         | CO <sub>2</sub>                | 2.8 M KHCO <sub>3</sub> /H <sub>2</sub> O                                                                            | WE : Pd/C<br>CE : Pt foil or gauze<br>RE : Ag/AgCl (3 M NaCl)                                    | -0.25 V vs. RHE                             | - | -    | 99.0 <sup>a</sup> | 9               |
| - | -                                                                                         | CO <sub>2</sub>                | 2.8 M KHCO <sub>3</sub> /H <sub>2</sub> O                                                                            | WE : Pd/C<br>CE : Pt foil or gauze<br>RE : Ag/AgCl (3 M NaCl)                                    | -0.35 V vs. RHE                             | - | -    | 99.0 <sup>a</sup> | 9               |
| - | -                                                                                         | N <sub>2</sub>                 | 2.8 M KHCO <sub>3</sub> /H <sub>2</sub> O                                                                            | WE : Pd/C<br>CE : Pt foil or gauze<br>RE : Ag/AgCl (3 M NaCl)                                    | -0.05 V vs. RHE                             | - | -    | 97.0 <sup>a</sup> | 9               |
| - | -                                                                                         | N <sub>2</sub>                 | 2.8 M KHCO <sub>3</sub> /H <sub>2</sub> O                                                                            | WE : Pd/C<br>CE : Pt foil or gauze<br>RE : Ag/AgCl (3 M NaCl)                                    | -0.15 V vs. RHE                             | - | -    | 88.0 <sup>a</sup> | 9               |
| - | -                                                                                         | N <sub>2</sub>                 | 2.8 M KHCO <sub>3</sub> /H <sub>2</sub> O                                                                            | WE : Pd/C<br>CE : Pt foil or gauze<br>RE : Ag/AgCl (3 M NaCl)                                    | -0.25 V vs. RHE                             | - | -    | 52.0 <sup>a</sup> | 9               |
| - | -                                                                                         | Anolyte : Humid H <sub>2</sub> | Catholyte : 3.0 M KHCO <sub>3</sub> /H <sub>2</sub> O                                                                | Cathode : Ag foam<br>Anode : Pt/C<br>RE : Ag/AgCl (3 M NaCl)                                     | 500 mA/cm <sup>2</sup> , 2.2 V <sup>b</sup> | - | 15.0 | -                 | 10 <sup>c</sup> |
| - | -                                                                                         | Anolyte : Humid H <sub>2</sub> | Catholyte : 3.0 M KHCO <sub>3</sub> /H <sub>2</sub> O                                                                | Thickness of Nafion : 25 $\mu$ m<br>Cathode : Ag foam<br>Anode : Pt/C<br>RE : Ag/AgCl (3 M NaCl) | 100 mA/cm <sup>2</sup> , 1.7 V <sup>b</sup> | - | 43.0 | -                 | 10 <sup>c</sup> |
| - | -                                                                                         | Anolyte : Humid H <sub>2</sub> | Catholyte : 3.0 M KHCO <sub>3</sub> /H <sub>2</sub> O                                                                | Thickness of Nafion : 50 $\mu$ m<br>Cathode : Ag foam<br>Anode : Pt/C<br>RE : Ag/AgCl (3 M NaCl) | 100 mA/cm <sup>2</sup> , 2.5 V <sup>b</sup> | - | 47.0 | -                 | 10 <sup>c</sup> |
| - | 500 $\mu$ m PTFE gasket between the Nafion membrane and the cathode                       | Anolyte : Humid H <sub>2</sub> | Catholyte : 3.0 M KHCO <sub>3</sub> /H <sub>2</sub> O                                                                | Thickness of Nafion : 50 $\mu$ m<br>Cathode : Ag foam<br>Anode : Pt/C<br>RE : Ag/AgCl (3 M NaCl) | 100 mA/cm <sup>2</sup> , 2.5 V <sup>b</sup> | - | 71.0 | -                 | 10 <sup>c</sup> |
| - | 95% Ag coverage on Ag GDE obtained by spray-coat deposition and physical vapor deposition | N <sub>2</sub>                 | Catholyte : 3.0 M KHCO <sub>3</sub> /H <sub>2</sub> O (0.02 M EDTA for preventing impurities)<br>Anolyte : 1.0 M KOH | Cathode : Ag GDE<br>Anode : Ni foam<br>Membrane : BPM                                            | 100 mA/cm <sup>2b</sup>                     | - | 82.0 | -                 | 11 <sup>c</sup> |
| - | 95% Ag coverage on Ag GDE obtained by spray-coat deposition and physical vapor deposition | N <sub>2</sub>                 | Catholyte : 3.0 M KHCO <sub>3</sub> /H <sub>2</sub> O (0.02 M EDTA for preventing impurities)<br>Anolyte : 1.0 M KOH | Cathode : Ag GDE<br>Anode : Ni foam<br>Membrane : BPM                                            | 200 mA/cm <sup>2b</sup>                     | - | 62.0 | -                 | 11 <sup>c</sup> |



|   |   |                 |                                                                                                                        |                                                                                         |                    |      |      |   |    |
|---|---|-----------------|------------------------------------------------------------------------------------------------------------------------|-----------------------------------------------------------------------------------------|--------------------|------|------|---|----|
| - | - | CO <sub>2</sub> | 0.1 M KH <sub>2</sub> PO <sub>4</sub> , K <sub>2</sub> HPO <sub>4</sub><br>Phosphate buffer solutions/H <sub>2</sub> O | WE : HPG-Ppy coated on<br>a glassy carbon<br>CE : Pt foil<br>RE : Ag/AgCl (3 M<br>NaCl) | -0.61 V vs.<br>RHE | 80.0 | 7.3  | - | 12 |
| - | - | Ar              | 0.13 M KHCO <sub>3</sub> /H <sub>2</sub> O                                                                             | WE : HPG-Ppy coated on<br>a glassy carbon<br>CE : Pt foil<br>RE : Ag/AgCl (3 M<br>NaCl) | -0.61 V vs.<br>RHE | 85.0 | 3.4  | - | 12 |
| - | - | CO <sub>2</sub> | 0.1 M KHCO <sub>3</sub> /H <sub>2</sub> O                                                                              | WE : HPG-Ppy coated on<br>a glassy carbon<br>CE : Pt foil<br>RE : Ag/AgCl (3 M<br>NaCl) | -0.61 V vs.<br>RHE | 45.0 | 31.6 | - | 12 |

<sup>a</sup>FE 2 h after electrolysis. <sup>b</sup>The applied current density and the full cell voltage. <sup>c</sup>Full cell reaction (electrolyzer)

**Table. S3** Summary of CO<sub>2</sub> reduction reaction using ILs-based absorbent.

| Co-catalysts | Additive                                    | Feed gas        | Solvent + electrolyte                                                                                                                                                    | Electrode                                                                                                       | Applied potential                | FE of H <sub>2</sub> (%) | FE of CO (%) | FE of formate/formic acid (%) | Ref.            |
|--------------|---------------------------------------------|-----------------|--------------------------------------------------------------------------------------------------------------------------------------------------------------------------|-----------------------------------------------------------------------------------------------------------------|----------------------------------|--------------------------|--------------|-------------------------------|-----------------|
| -            | -                                           | CO <sub>2</sub> | Catholyte : 18 mol% [emim][BF <sub>4</sub> ]/H <sub>2</sub> O<br>Anolyte : 100 mM sulfuric acid/H <sub>2</sub> O                                                         | Cathode : Ag GDL<br>Anode : Pt GDL<br>RE : Ag/AgCl                                                              | 1.5 V <sup>b</sup>               | < 3.0                    | > 96.0       | -                             | 13 <sup>c</sup> |
| -            | -                                           | CO <sub>2</sub> | Catholyte : 18 mol% [emim][BF <sub>4</sub> ]/H <sub>2</sub> O<br>Anolyte : 100 mM sulfuric acid/H <sub>2</sub> O                                                         | Cathode : Ag GDL<br>Anode : Pt GDL<br>RE : Ag/AgCl                                                              | 2.0 V <sup>b</sup>               | < 3.0                    | > 96.0       | -                             | 13 <sup>c</sup> |
| -            | -                                           | CO <sub>2</sub> | Catholyte : 18 mol% [emim][BF <sub>4</sub> ]/H <sub>2</sub> O<br>Anolyte : 100 mM sulfuric acid/H <sub>2</sub> O                                                         | Cathode : Ag GDL<br>Anode : Pt GDL<br>RE : Ag/AgCl                                                              | 2.5 V <sup>b</sup>               | < 3.0                    | > 96.0       | -                             | 13 <sup>c</sup> |
| -            | -                                           | CO <sub>2</sub> | 0.1 M TEAP/CH <sub>3</sub> CN                                                                                                                                            | WE : Pb sheet<br>CE : Pt gauze<br>RE : Ag/AgNO <sub>3</sub> (calibrated against Fc/Fc <sup>+</sup> )            | -2.4 V vs. Ag/AgNO <sub>3</sub>  | -                        | 9.0          | -                             | 14              |
| -            | -                                           | CO <sub>2</sub> | 0.1 M [emim][Tf <sub>2</sub> N]/CH <sub>3</sub> CN                                                                                                                       | WE : Pb sheet<br>CE : Pt gauze<br>RE : Ag/AgNO <sub>3</sub> (calibrated against Fc/Fc <sup>+</sup> )            | -2.25 V vs. Ag/AgNO <sub>3</sub> | -                        | 44.0         | -                             | 14              |
| -            | 50 mM [bmim][BF <sub>4</sub> ] in catholyte | Ar              | Catholyte : 0.1 M TBAPF <sub>6</sub> /CH <sub>3</sub> CN<br>Anolyte : 0.5 M sodium phosphate buffer containing 0.5 mM cobaltous nitrate                                  | Cathode : Sn<br>Anode : Pt foil<br>RE : Ag/AgCl                                                                 | -1.952 V vs. NHE                 | 97.0                     | -            | -                             | 15 <sup>c</sup> |
| -            | 50 mM [bmim][BF <sub>4</sub> ] in catholyte | CO <sub>2</sub> | Catholyte : 0.1 M TBAPF <sub>6</sub> /CH <sub>3</sub> CN<br>Anolyte : 0.5 M sodium phosphate buffer containing 0.5 mM cobaltous nitrate                                  | Cathode : Sn<br>Anode : Pt foil<br>RE : Ag/AgCl                                                                 | -1.952 V vs. NHE                 | 5.1                      | 79.9         | -                             | 15 <sup>c</sup> |
| -            | 50 mM [bmim][BF <sub>4</sub> ] in catholyte | CO <sub>2</sub> | Catholyte : 0.1 M TBAPF <sub>6</sub> /CH <sub>3</sub> CN<br>Anolyte : 0.5 M sodium phosphate buffer containing 0.5 mM cobaltous nitrate                                  | Cathode : Sn<br>Anode : Pt foil<br>RE : Ag/AgCl                                                                 | -1.952 V vs. NHE                 | 3.8                      | 91.2         | -                             | 15 <sup>c</sup> |
| -            | 50 mM [bmim][BF <sub>4</sub> ] in catholyte | CO <sub>2</sub> | Catholyte : 0.1 M TBAPF <sub>6</sub> /CH <sub>3</sub> CN and H <sub>2</sub> O (90/10 v/v)<br>Anolyte : 0.5 M sodium phosphate buffer containing 0.5 mM cobaltous nitrate | Cathode : Sn<br>Anode : Pt foil<br>RE : Ag/AgCl                                                                 | -1.952 V vs. NHE                 | 6.67                     | 76.63        | -                             | 15 <sup>c</sup> |
| -            | -                                           | CO <sub>2</sub> | 0.5 M [Emim][N(CN) <sub>2</sub> ]/H <sub>2</sub> O                                                                                                                       | WE : Sn<br>CE : Pt<br>RE : Ag/AgCl (3 M NaCl)                                                                   | -1.6 V vs. NHE                   | -                        | -            | 45.0                          | 16              |
| -            | -                                           | CO <sub>2</sub> | 0.5 M [Emim][N(CN) <sub>2</sub> ]/H <sub>2</sub> O                                                                                                                       | WE : Sn<br>CE : Pt<br>RE : Ag/AgCl (3 M NaCl)                                                                   | -1.4 V vs. NHE                   | -                        | -            | 70.0                          | 16              |
| -            | -                                           | CO <sub>2</sub> | 0.5 M [Emim][N(CN) <sub>2</sub> ]/H <sub>2</sub> O                                                                                                                       | WE : Sn<br>CE : Pt<br>RE : Ag/AgCl (3 M NaCl)                                                                   | -1.2 V vs. NHE                   | -                        | -            | 81.9                          | 16              |
| -            | -                                           | CO <sub>2</sub> | 0.5 M [Emim][N(CN) <sub>2</sub> ]/H <sub>2</sub> O                                                                                                                       | WE : Sn<br>CE : Pt<br>RE : Ag/AgCl (3 M NaCl)                                                                   | -1.0 V vs. NHE                   | -                        | -            | 74.0                          | 16              |
| -            | -                                           | CO <sub>2</sub> | 0.5 M [Emim][N(CN) <sub>2</sub> ]/H <sub>2</sub> O                                                                                                                       | WE : Sn<br>CE : Pt<br>RE : Ag/AgCl (3 M NaCl)                                                                   | -0.8 V vs. NHE                   | -                        | -            | 22.0                          | 16              |
| -            | -                                           | CO <sub>2</sub> | 0.5 M [Emim][N(CN) <sub>2</sub> ]/H <sub>2</sub> O                                                                                                                       | WE : Sn<br>CE : Pt<br>RE : Ag/AgCl (3 M NaCl)                                                                   | -0.6 V vs. NHE                   | -                        | -            | 13.0                          | 16              |
| -            | -                                           | CO <sub>2</sub> | 0.05 M [Emim][N(CN) <sub>2</sub> ]/H <sub>2</sub> O                                                                                                                      | WE : Sn<br>CE : Pt<br>RE : Ag/AgCl (3 M NaCl)                                                                   | -1.2 V vs. NHE                   | -                        | -            | 15.0                          | 16              |
| -            | -                                           | CO <sub>2</sub> | 0.3 M [Emim][N(CN) <sub>2</sub> ]/H <sub>2</sub> O                                                                                                                       | WE : Sn<br>CE : Pt<br>RE : Ag/AgCl (3 M NaCl)                                                                   | -1.2 V vs. NHE                   | -                        | -            | 65.0                          | 16              |
| -            | -                                           | CO <sub>2</sub> | 0.7 M [Emim][N(CN) <sub>2</sub> ]/H <sub>2</sub> O                                                                                                                       | WE : Sn<br>CE : Pt<br>RE : Ag/AgCl (3 M NaCl)                                                                   | -1.2 V vs. NHE                   | -                        | -            | 77.0                          | 16              |
| -            | -                                           | CO <sub>2</sub> | 0.9 M [Emim][N(CN) <sub>2</sub> ]/H <sub>2</sub> O                                                                                                                       | WE : Sn<br>CE : Pt<br>RE : Ag/AgCl (3 M NaCl)                                                                   | -1.2 V vs. NHE                   | -                        | -            | 72.0                          | 16              |
| -            | -                                           | CO <sub>2</sub> | 0.1 M [P <sub>66614</sub> ][124Triz], 0.7 M H <sub>2</sub> O/CH <sub>3</sub> CN                                                                                          | WE : Au foil<br>CE : Pt coil<br>RE : Ag/AgNO <sub>3</sub> (dissolved in [C <sub>4</sub> mim][NO <sub>3</sub> ]) | -0.9 V vs. Ag/Ag <sup>+</sup>    | -                        | 4.3          | 49.7                          | 17              |
| -            | -                                           | CO <sub>2</sub> | 0.1 M [P <sub>66614</sub> ][124Triz], 0.7 M H <sub>2</sub> O/CH <sub>3</sub> CN                                                                                          | WE : Pt wire<br>CE : Pt coil<br>RE : Ag/AgNO <sub>3</sub> (dissolved in [C <sub>4</sub> mim][NO <sub>3</sub> ]) | -0.9 V vs. Ag/Ag <sup>+</sup>    | -                        | 1.6          | 52.0                          | 17              |
| -            | -                                           | CO <sub>2</sub> | 0.1 M [P <sub>66614</sub> ][124Triz], 0.7 M H <sub>2</sub> O/CH <sub>3</sub> CN                                                                                          | WE : Ag<br>CE : Pt coil<br>RE : Ag/AgNO <sub>3</sub> (dissolved in [C <sub>4</sub> mim][NO <sub>3</sub> ])      | -0.9 V vs. Ag/Ag <sup>+</sup>    | -                        | 5.6          | 10.1                          | 17              |
| -            | -                                           | CO <sub>2</sub> | 0.1 M [P <sub>66614</sub> ][124Triz], 0.7 M H <sub>2</sub> O/CH <sub>3</sub> CN                                                                                          | WE : Au foil<br>CE : Pt coil<br>RE : Ag/AgNO <sub>3</sub> (dissolved in [C <sub>4</sub> mim][NO <sub>3</sub> ]) | -1.9 V vs. Ag/Ag <sup>+</sup>    | 4.3                      | 5.1          | 16.1                          | 17              |
| -            | -                                           | CO <sub>2</sub> | 0.1 M [P <sub>66614</sub> ][124Triz], 0.7 M H <sub>2</sub> O/CH <sub>3</sub> CN                                                                                          | WE : Pt wire<br>CE : Pt coil<br>RE : Ag/AgNO <sub>3</sub> (dissolved in [C <sub>4</sub> mim][NO <sub>3</sub> ]) | -1.9 V vs. Ag/Ag <sup>+</sup>    | 15.6                     | 0.8          | 16.3                          | 17              |

|                    |   |                 |                                                                                                                                    |                                                                                                            |                               |      |       |     |                 |
|--------------------|---|-----------------|------------------------------------------------------------------------------------------------------------------------------------|------------------------------------------------------------------------------------------------------------|-------------------------------|------|-------|-----|-----------------|
| -                  | - | CO <sub>2</sub> | 0.1 M [P <sub>66614</sub> ][124Triz], 0.7 M H <sub>2</sub> O/CH <sub>3</sub> CN                                                    | WE : Ag<br>CE : Pt coil<br>RE : Ag/AgNO <sub>3</sub> (dissolved in [C <sub>4</sub> mim][NO <sub>3</sub> ]) | -1.9 V vs. Ag/Ag <sup>+</sup> | 41.1 | 6.4   | 3.2 | 17              |
| -                  | - | CO <sub>2</sub> | 4 mol % [emim][BF <sub>4</sub> ]/H <sub>2</sub> O                                                                                  | WE : MoS <sub>2</sub><br>CE : Pt gauze<br>RE : Ag wire                                                     | -0.764 V vs. RHE              | -    | 98.0  | -   | 18              |
| -                  | - | CO <sub>2</sub> | 50 vol % [emim][BF <sub>4</sub> ]/H <sub>2</sub> O                                                                                 | WE : WSe <sub>2</sub> nanoflakes<br>CE : Pt gauze<br>RE : Ag/AgCl                                          | -0.164 V vs. RHE              | -    | 24.0  | -   | 18              |
| -                  | - | CO <sub>2</sub> | 25 mol % [emim][BF <sub>4</sub> ]/H <sub>2</sub> O                                                                                 | WE : Metal free carbon nanofibers<br>CE : Pt gauze<br>RE : Ag wire                                         | -0.573 V vs. SHE              | -    | 98.0  | -   | 18              |
| -                  | - | CO <sub>2</sub> | Catholyte : 10.5 mol % [emim][BF <sub>4</sub> ]/H <sub>2</sub> O<br>Anolyte : 100 mM sulfuric acid/H <sub>2</sub> O                | Cathode : Ag GDL<br>Anode : Pt GDL<br>RE : Ag/AgCl                                                         | 2.5 V <sup>b</sup>            | -    | 100.0 | -   | 18 <sup>c</sup> |
| -                  | - | CO <sub>2</sub> | 80 wt % [bmim][Cl]/H <sub>2</sub> O                                                                                                | WE : Ag<br>CE : Pt wire<br>RE : SCE                                                                        | -1.5 V vs. SCE                | -    | > 99  | -   | 18              |
| Poly-CoTAPP on ITO | - | CO <sub>2</sub> | [bmim][BF <sub>4</sub> ]                                                                                                           | WE : ITO<br>CE : Pt wire<br>RE : Ag/AgCl                                                                   | -0.8 V vs. Ag/AgCl            | -    | 64.9  | -   | 18              |
| -                  | - | CO <sub>2</sub> | Catholyte : 92 vol % [emim][BF <sub>4</sub> ]/H <sub>2</sub> O<br>Anolyte : 0.5 M H <sub>2</sub> SO <sub>4</sub> /H <sub>2</sub> O | Cathode : Ag/Al foam<br>Anode : Pt gauze<br>RE : Pt wire                                                   | -1.8 V vs. Pt                 | -    | 75.0  | -   | 18              |

<sup>a</sup>FE 2 h after electrolysis. <sup>b</sup>The applied current density the full cell voltage. <sup>c</sup>Full cell reaction (electrolyzer)

**Table. S4** Summary of CO<sub>2</sub> reduction reaction using MOFs/COFs-based absorbent

| Co-catalysts | Additive | Feed gas                           | Solvent + electrolyte                                   | Electrode                                                                                        | Applied potential  | FE of H <sub>2</sub> (%) | FE of CO (%)      | FE of formate/formic acid (%) | FE of CH <sub>4</sub> (%) | FE of C <sub>2</sub> H <sub>4</sub> (%) | Ref. |
|--------------|----------|------------------------------------|---------------------------------------------------------|--------------------------------------------------------------------------------------------------|--------------------|--------------------------|-------------------|-------------------------------|---------------------------|-----------------------------------------|------|
|              |          |                                    |                                                         | Cathode : Cu dimer distorted HKUST-1                                                             |                    |                          |                   |                               |                           |                                         |      |
| -            | -        | CO <sub>2</sub>                    | 1 M KOH/H <sub>2</sub> O                                | GDL<br>Anode : Pt foil<br>RE : Ag/AgCl                                                           | -1.07 V vs. RHE    | 7.0                      | 24.0              | -                             | 0.4                       | 45.0                                    | 19   |
| -            | -        | CO <sub>2</sub>                    | 0.5 M KHCO <sub>3</sub> /H <sub>2</sub> O               | WE : NiNPIC on carbon paper<br>CE : Pt plate<br>RE : Ag/AgCl                                     | -0.65 V vs. RHE    | -                        | 95.1              | -                             | -                         | -                                       | 20   |
| -            | -        | CO <sub>2</sub>                    | 0.1 M KHCO <sub>3</sub> /H <sub>2</sub> O               | WE : Zn-MOF74 on glassy carbon<br>CE : Pt mesh<br>RE : SCE                                       | -1.25 V vs. RHE    | 55.0                     | 45.0              | -                             | -                         | -                                       | 21   |
| -            | -        | CO <sub>2</sub>                    | 0.1 M KHCO <sub>3</sub> /H <sub>2</sub> O               | WE : ZnCa-MOF74 on glassy carbon<br>CE : Pt mesh<br>RE : SCE                                     | -1.25 V vs. RHE    | 7.0                      | 93.0              | -                             | -                         | -                                       | 21   |
| -            | -        | 5% N <sub>2</sub> /CO <sub>2</sub> | 0.25 M K <sub>2</sub> SO <sub>4</sub> /H <sub>2</sub> O | WE : ZIF-8<br>CE : Pt wire<br>RE : Ag/AgCl                                                       | -1.1 V vs. RHE     | -                        | 81.0              | -                             | -                         | -                                       | 22   |
| -            | -        | 5% N <sub>2</sub> /CO <sub>2</sub> | 0.25 M K <sub>2</sub> SO <sub>4</sub> /H <sub>2</sub> O | WE : ZIF-7<br>CE : Pt wire<br>RE : Ag/AgCl                                                       | -1.1 V vs. RHE     | -                        | 23.8              | -                             | -                         | -                                       | 22   |
| -            | -        | 5% N <sub>2</sub> /CO <sub>2</sub> | 0.25 M K <sub>2</sub> SO <sub>4</sub> /H <sub>2</sub> O | WE : ZIF-108<br>CE : Pt wire<br>RE : Ag/AgCl                                                     | -1.1 V vs. RHE     | -                        | 63.5              | -                             | -                         | -                                       | 22   |
| -            | -        | 5% N <sub>2</sub> /CO <sub>2</sub> | 0.25 M K <sub>2</sub> SO <sub>4</sub> /H <sub>2</sub> O | WE : SIM-1<br>CE : Pt wire<br>RE : Ag/AgCl                                                       | -1.1 V vs. RHE     | -                        | 66.6              | -                             | -                         | -                                       | 22   |
| -            | -        | CO <sub>2</sub>                    | 0.1 M KHCO <sub>3</sub> /H <sub>2</sub> O               | WE : Fe <sub>0.07</sub> Cu-N-C <sub>800</sub><br>CE : Pt wire<br>RE : Ag/AgCl                    | -1.2 V vs. Ag/AgCl | -                        | 48.0              | -                             | -                         | -                                       | 23   |
| -            | -        | CO <sub>2</sub>                    | 0.1 M KHCO <sub>3</sub> /H <sub>2</sub> O               | WE : PcCu-O <sub>8</sub> -Zn/CNT<br>CE : Pt mesh<br>RE : Ag/AgCl                                 | -0.7 V vs. RHE     | 12.0                     | 88.0              | -                             | -                         | -                                       | 24   |
| -            | -        | CO <sub>2</sub>                    | 0.1 M KHCO <sub>3</sub> /H <sub>2</sub> O               | WE : PcZn-O <sub>8</sub> -Zn/CNT<br>CE : Pt mesh<br>RE : Ag/AgCl                                 | -0.7 V vs. RHE     | 37.0                     | 63.0              | -                             | -                         | -                                       | 24   |
| -            | -        | CO <sub>2</sub>                    | 0.1 M KHCO <sub>3</sub> /H <sub>2</sub> O               | WE : PcZn-O <sub>8</sub> -Cu/CNT<br>CE : Pt mesh<br>RE : Ag/AgCl                                 | -0.7 V vs. RHE     | 94.0                     | 6.0               | -                             | -                         | -                                       | 24   |
| -            | -        | CO <sub>2</sub>                    | 0.1 M KHCO <sub>3</sub> /H <sub>2</sub> O               | WE : PcCu-O <sub>8</sub> -Cu/CNT<br>CE : Pt mesh<br>RE : Ag/AgCl                                 | -0.7 V vs. RHE     | 90.0                     | 10.0              | -                             | -                         | -                                       | 24   |
| -            | -        | CO <sub>2</sub>                    | 0.5 M KHCO <sub>3</sub> /H <sub>2</sub> O               | WE : Co(TAP)<br>CE : graphite<br>RE : Ag/AgCl                                                    | -0.67 V vs. RHE    | -                        | 80.0              | -                             | -                         | -                                       | 25   |
| -            | -        | CO <sub>2</sub>                    | 0.5 M KHCO <sub>3</sub> /H <sub>2</sub> O               | WE : COF-366-Co<br>CE : graphite<br>RE : Ag/AgCl                                                 | -0.67 V vs. RHE    | -                        | 90.0              | -                             | -                         | -                                       | 25   |
| -            | -        | CO <sub>2</sub>                    | 0.5 M KHCO <sub>3</sub> /H <sub>2</sub> O               | WE : COF-367-Co<br>CE : graphite<br>RE : Ag/AgCl                                                 | -0.67 V vs. RHE    | -                        | 91.0              | -                             | -                         | -                                       | 25   |
| -            | -        | CO <sub>2</sub>                    | 0.5 M KHCO <sub>3</sub> /H <sub>2</sub> O               | WE : COF-367-Co(10%)<br>CE : graphite<br>RE : Ag/AgCl                                            | -0.67 V vs. RHE    | -                        | 70.0              | -                             | -                         | -                                       | 25   |
| -            | -        | CO <sub>2</sub>                    | 0.5 M KHCO <sub>3</sub> /H <sub>2</sub> O               | WE : COF-367-Co(1%)<br>CE : graphite<br>RE : Ag/AgCl                                             | -0.67 V vs. RHE    | -                        | 40.0              | -                             | -                         | -                                       | 25   |
| -            | -        | CO <sub>2</sub>                    | 0.5 M KHCO <sub>3</sub> /H <sub>2</sub> O               | WE : COF-366-Co thin films on glassy carbon<br>CE : graphite<br>RE : Ag/AgCl                     | -0.67 V vs. RHE    | -                        | 86.0              | -                             | -                         | -                                       | 25   |
| -            | -        | CO <sub>2</sub>                    | 0.1 M KHCO <sub>3</sub> /H <sub>2</sub> O               | WE : COF-300-AR/Ag foil<br>CE : carbon paper<br>RE : SCE                                         | -0.85 V vs. RHE    | 10.0                     | 80.0 <sup>a</sup> | -                             | -                         | -                                       | 26   |
| -            | -        | CO <sub>2</sub>                    | 0.5 M KHCO <sub>3</sub> /H <sub>2</sub> O               | WE : COF-Re on carbon fabric<br>CE : carbon fabric<br>RE : Ag/AgCl (saturated KCl)               | -1.1 V vs. SHE     | 11.0                     | -                 | -                             | -                         | -                                       | 27   |
| -            | -        | CO <sub>2</sub>                    | 0.5 M KHCO <sub>3</sub> /H <sub>2</sub> O               | WE : COF-Re <sub>Co</sub> on carbon fabric<br>CE : carbon fabric<br>RE : Ag/AgCl (saturated KCl) | -1.1 V vs. SHE     | 55.0                     | 18.0              | -                             | -                         | -                                       | 27   |
| -            | -        | CO <sub>2</sub>                    | 0.5 M KHCO <sub>3</sub> /H <sub>2</sub> O               | WE : COF-Re <sub>Fe</sub> on carbon fabric<br>CE : carbon fabric<br>RE : Ag/AgCl (saturated KCl) | -1.1 V vs. SHE     | 65.0                     | < 2.0             | -                             | -                         | -                                       | 27   |

<sup>a</sup>FE 2 h after electrolysis.

| <b>CO</b>                             |           |                   | <b>HCOOH</b> |           |                   | <b>HCHO</b> |           |                   |         |
|---------------------------------------|-----------|-------------------|--------------|-----------|-------------------|-------------|-----------|-------------------|---------|
| TWh/1 Gt CO <sub>2</sub> <sup>a</sup> | 1628      |                   |              | 1803      |                   |             | 3167      |                   |         |
| TWy/1 Gt CO <sub>2</sub>              | 0.186     |                   |              | 0.206     |                   |             | 0.361     |                   |         |
| Renewable sources <sup>b</sup>        | Biofuels  | Solar electricity | Wind         | Biofuels  | Solar electricity | Wind        | Biofuels  | Solar electricity | Wind    |
| Land requirement (km <sup>2</sup> )   | 1,246,200 | 39,060            | 372,000      | 1,380,200 | 43,260            | 412,000     | 2,418,700 | 75,810            | 720,000 |

  

| <b>CH<sub>3</sub>OH</b>               |           |                   | <b>CH<sub>4</sub></b> |           |                   | <b>C<sub>2</sub>H<sub>4</sub></b> |           |                   |           |
|---------------------------------------|-----------|-------------------|-----------------------|-----------|-------------------|-----------------------------------|-----------|-------------------|-----------|
| TWh/1 Gt CO <sub>2</sub> <sup>a</sup> | 4437      |                   |                       | 5170      |                   |                                   | 8523      |                   |           |
| TWy/1 Gt CO <sub>2</sub>              | 0.506     |                   |                       | 0.590     |                   |                                   | 0.973     |                   |           |
| Renewable sources <sup>b</sup>        | Biofuels  | Solar electricity | Wind                  | Biofuels  | Solar electricity | Wind                              | Biofuels  | Solar electricity | Wind      |
| Land requirement (km <sup>2</sup> )   | 3,390,200 | 106,260           | 1,000,000             | 3,953,000 | 123,900           | 1,180,000                         | 6,519,100 | 204,330           | 1,946,000 |

**Table. S5** Ideal energy and the corresponding land requirements of CO<sub>2</sub> reduction products according to renewable sources

<sup>a</sup>Ideal energy requirements for converting CO<sub>2</sub> into various products at zero overpotential and 100% Faradaic efficiency (FE).<sup>28</sup> <sup>b</sup>Land requirements for biofuels, solar electricity, and wind used in the estimation are 6.7, 0.21, 2 m<sup>2</sup>/W, respectively.<sup>29</sup>

## References

1. Chen, L. *et al.* Electrochemical Reduction of Carbon Dioxide in a Monoethanolamine Capture Medium. *ChemSusChem* **10**, 4109–4118 (2017).
2. Bhattacharya, M., Sebghati, S., Vercella, Y. M. & Saouma, C. T. Electrochemical Reduction of Carbamates and Carbamic Acids: Implications for Combined Carbon Capture and Electrochemical CO<sub>2</sub> Recycling. *J. Electrochem. Soc.* **167**, 086507 (2020).
3. Bhattacharya, M., Sebghati, S., Vanderlinden, R. T. & Saouma, C. T. Toward Combined Carbon Capture and Recycling: Addition of an Amine Alters Product Selectivity from CO to Formic Acid in Manganese Catalyzed Reduction of CO<sub>2</sub>. *J. Am. Chem. Soc.* **142**, 17589–17597 (2020).
4. Margarit, C. G., Asimow, N. G., Costentin, C. & Nocera, D. G. Tertiary Amine-Assisted Electroreduction of Carbon Dioxide to Formate Catalyzed by Iron Tetrphenylporphyrin. *ACS Energy Lett.* **5**, 72–78 (2020).
5. Bonet Navarro, A., Nogalska, A. & Garcia-Valls, R. Direct Electrochemical Reduction of Bicarbonate to Formate Using Tin Catalyst. *Electrochem* **2**, 64–70 (2021).
6. Gutiérrez-Sánchez, O. *et al.* The inhibition of the proton donor ability of bicarbonate promotes the electrochemical conversion of CO<sub>2</sub> in bicarbonate solutions. *J. CO<sub>2</sub> Util.* **48**, 101521 (2021).
7. Hosseini, S. *et al.* Improvement of product selectivity in bicarbonate reduction into formic acid on a tin-based catalyst by integrating nano-diamond particles. *Process Saf. Environ. Prot.* **116**, 494–505 (2018).
8. Tapan, N. A. CO<sub>2</sub> electroreduction on P4VP modified copper deposited gas diffusion layer electrode: pH effect. *Mater. Renew. Sustain. Energy* **19**, 1–10 (2016).
9. Min, X. & Kanan, M. W. Pd-Catalyzed Electrohydrogenation of Carbon Dioxide to Formate: High Mass Activity at Low Overpotential and Identification of the Deactivation Pathway. *J. Am. Chem. Soc.* **137**, 4701–4708 (2015).
10. Zhang, Z., Lees, E. W., Ren, S., Huang, A. & Berlinguette, C. P. Electrolytic Conversion of Bicarbonate Solutions to CO at >500 mA cm<sup>-2</sup> and 2.2 V. *ChemRxiv* 1–13 (2021).
11. Lees, E. W. *et al.* Electrodes Designed for Converting Bicarbonate into CO. *ACS Energy Lett.* **5**, 2165–2173 (2020).
12. Hursán, D. & Janáky, C. Electrochemical Reduction of Carbon Dioxide on Nitrogen-Doped Carbons: Insights from Isotopic Labeling Studies. *ACS Energy Lett.* **3**, 722–723 (2018).
13. Rosen, B. A. *et al.* Ionic liquid-mediated selective conversion of CO<sub>2</sub> to CO at low overpotentials. *Science* **334**, 643–644 (2011).
14. Sun, L., Ramesha, G. K., Kamat, P. V. & Brennecke, J. F. Switching the reaction course of electrochemical CO<sub>2</sub> reduction with ionic liquids. *Langmuir* **30**, 6302–6308 (2014).
15. Ganesh, I. BMIM-BF<sub>4</sub> RTIL: Synthesis, Characterization and Performance Evaluation for Electrochemical CO<sub>2</sub> Reduction to CO over Sn and MoSi<sub>2</sub> Cathodes. *C — J. Carbon Res.* **6**, 47 (2020).
16. Zhang, X. *et al.* Electrochemical Reduction of Carbon Dioxide to Formic Acid in Ionic Liquid [Emim][N(CN)<sub>2</sub>]/Water System. *Electrochim. Acta* **247**, 281–287 (2017).
17. Hollingsworth, N. *et al.* CO<sub>2</sub> capture and electrochemical conversion using superbasic [P<sub>66614</sub>][124Triz]. *Faraday Discuss.* **183**, 389–400 (2015).
18. Maniam, K. K. & Paul, S. Ionic liquids and deep eutectic solvents for CO<sub>2</sub> conversion technologies—a review. *Materials* **14**, 4519 (2021).
19. Nam, D. H. *et al.* Metal-Organic Frameworks Mediate Cu Coordination for Selective CO<sub>2</sub> Electroreduction. *J. Am. Chem. Soc.* **140**, 11378–11386 (2018).
20. Ma, Z. *et al.* Ultrasonic assisted synthesis of Zn-Ni bi-metal MOFs for interconnected Ni-N-C materials with

- enhanced electrochemical reduction of CO<sub>2</sub>. *J. CO<sub>2</sub> Util.* **32**, 251–258 (2019).
21. Van Phuc, T., Kang, S. G., Chung, J. S. & Hur, S. H. Highly CO selective Ca and Zn hybrid metal-organic framework electrocatalyst for the electrochemical reduction of CO<sub>2</sub>. *Curr. Appl. Phys.* **27**, 31–37 (2021).
  22. Jiang, X. *et al.* Carbon dioxide electroreduction over imidazolate ligands coordinated with Zn(II) center in ZIFs. *Nano Energy* **52**, 345–350 (2018).
  23. Cao, S. M. *et al.* Iron-doping on Cu-N-C composite with enhanced CO faraday efficiency for the electrochemical reduction of CO<sub>2</sub>. *J. CO<sub>2</sub> Util.* **44**, 101418 (2021).
  24. Zhong, H. *et al.* Synergistic electroreduction of carbon dioxide to carbon monoxide on bimetallic layered conjugated metal-organic frameworks. *Nat. Commun.* **11**, 1409 (2020).
  25. Lin, S. *et al.* Covalent organic frameworks comprising cobalt porphyrins for catalytic CO<sub>2</sub> reduction in water. *Science* **349**, 1208–1213 (2015).
  26. Liu, H. *et al.* Covalent Organic Frameworks Linked by Amine Bonding for Concerted Electrochemical Reduction of CO<sub>2</sub>. *Chem* **4**, 1696–1709 (2018).
  27. Johnson, E. M., Haiges, R. & Marinescu, S. C. Covalent-Organic Frameworks Composed of Rhenium Bipyridine and Metal Porphyrins: Designing Heterobimetallic Frameworks with Two Distinct Metal Sites. *ACS Appl. Mater. Interfaces* **10**, 37919–37927 (2018).
  28. Kauffman, D. R. *et al.* Efficient Electrochemical CO<sub>2</sub> conversion Powered by Renewable Energy. *ACS Appl. Mater. Interfaces* **7**, 15626–15632 (2015).
  29. De Castro, C. *et al.* A top-down approach to assess physical and ecological limits of biofuels. *Energy* **64**, 506–512 (2014).
